# Supplementary figures and images for: Interspaced Repeat Sequences Confer the Regulatory Functions of AtXTH10, Important for Root Growth in Arabidopsis
Source: MDPI journal article supplement (doi:10.3390/plants8050130), 2019-05-16

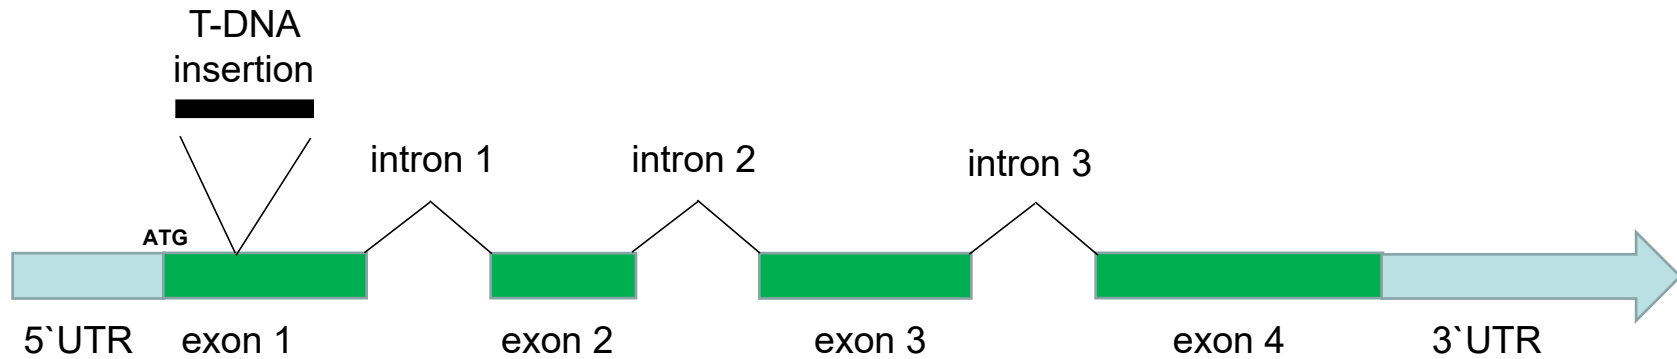

Supplement: s1 [file s1]
